# Supplementary material for: A Laboratory-intensive Course on RNA Interference and Model Organisms
Source: Atypon-hosted journal article supplement (doi:10.1187/cbe.09-02-0012), 2009-12-01
Supplement: supp4.pdf [file supp4.pdf]

## Appendix 4: Grading Guidelines for Mammalian Lab Report

### Introduction

- Elbashir et al. 2001, size matters
- Describe all 4 constructs and purpose
  - Scrambled (scm): what it targets, no silencing
  - AmbGFP: what it targets, amount of mismatch w/ egfp, possibly no silencing
- CMV-EGFP stably expressed

### Materials and Methods

- Plasmid prep Endotoxin free, quantification and gel
- Transient transfection (and cell count practice, don't need to mention)
  - mention Lipofectamine2000 and the conditions
  - purpose of no DNA and no Lipofectamine2000 reactions
- Visual assessment of transfected samples & microplate (qualitative and quantitative)
- Cell counts for transfected cells and cell/mL
- Volumes used for 20,000 and 40,000 cells
- Gel, transfer, and western blot

### Results:

- Plasmids prep
  - Agarose gel picture, and amounts and purity
- Confluency
- Visual assessment of transfected samples- pictures
- Microplate reads: values, average, and %silencing or remaining
  - mention corrected for background and normalized to scrambled
  - Class data
- rainbow marker showed transfer worked
- Western blot image and quantification with Kodak MI software
  - was a correct sized band detected?

### Discussion:

- Define silencing phenotype
- For each condition (siEGFP439 and 497, AmbGFP and scrambled)
  - Should mention if they expected no, little or lots of silencing
  - what they saw
  - did this match expectations? Why or why not?
  - which construct worked best
- Transient transfection silencing: visually correspond to microplate
- Quality of microplate data:
  - how were replicates?
  - 2X twice 1X?
  - Comparison to class
- Western blot

- Could you tell a difference in protein levels for the samples?
- How relate to microplate data?
- Lipofectamine2000 toxic? - comparison of OptiMEM only to No DNA sample

References: Class protocols and Elbashir et al. 2001 paper
