# Supplementary material for: A Laboratory-intensive Course on RNA Interference and Model Organisms
Source: Atypon-hosted journal article supplement (doi:10.1187/cbe.09-02-0012), 2009-12-01
Supplement: supp5.pdf [file supp5.pdf]

## Appendix 5: siRNA Design Assignment

You would like to design an siRNA to target vimentin, GenBank Accession number NM\_003380. A colleague suggested the following two siRNAs:

| Name     | Sequence            | Start* |
|----------|---------------------|--------|
| siVM1156 | GCGTGAAATGGAAGAGAAC | 1156   |
| siVM1246 | GGAAATGGCTCGTCACCTT | 1246   |

\*Start number indicate the starting position of the siRNA relative to the first nucleotide in the GenBank sequence.

To complete this assignment, you need to visit more than one online siRNA design site, e.g., Dharmacon's siDesign Center, Invitrogen's BLOCK-iT™ RNAi Designer, etc., and to decide which siRNA (siVM1156 or siVM1246) you expect to work better.

Answer the following questions:

- A. Sites visited? Include a printout of the results obtained from each.
  - 1.
  - 2.
- B. Which siRNA expected to work better?
- C. Briefly describe why you believe one would work better than the other.
